# Supplementary material for: Programmed self-assembly of conjugated oligomer-based helical nanofibres through hydrogen bonding interactions
Source: Royal Society of Chemistry journal article supplement (doi:10.1039/d4ma01057d), 2024-11-28
Supplement: d4ma01057d1.pdf [file d4ma01057d1.pdf]

## Electronic Supplementary Information

### Programmed Self-Assembly of Conjugated Oligomer-Based Helical Nanofibres through Hydrogen-Bonding Interactions

Yu Wang,<sup>a+</sup> Guoxin Yin,<sup>a+</sup> Pradeep Cheraku,<sup>b+</sup> Yu Xia,<sup>a</sup> Yuping Yuan,<sup>a</sup> Peng Miao,<sup>c</sup> Huidong Zang,<sup>d</sup> Mircea Cotlet,<sup>d\*</sup> Ping Xu,<sup>c\*</sup> Hsing-Lin Wang<sup>a,b\*</sup>

- a. Department of Materials Science and Engineering, Southern University of Science and Technology, Xueyuan Avenue 1088, Shenzhen 518055, P. R. China*
- b. Physical Chemistry and Spectroscopy group, Chemistry Division, Los Alamos National Laboratory, Los Alamos, NM, 87545*
- c. Harbin Institute of Technology, 92 Xidazhi Street, Nangang, Harbin, Heilongjiang, P.R. China.*
- d. Center for Functional Nanomaterials, Brookhaven National Laboratory, Upton, New York 11973, United States.*

*Email: wangxl3@sustech.edu.cn*

## **Table of Contents**

|                                                                    |           |
|--------------------------------------------------------------------|-----------|
| <b>1. Molecular design</b> .....                                   | <b>3</b>  |
| <b>2. Synthesis of L1 to L9</b> .....                              | <b>3</b>  |
| 2.1 Synthesis of L 5 .....                                         | 3         |
| 2.2 Synthesis of L 6 .....                                         | 5         |
| 2.3 Synthesis of L 8 .....                                         | 7         |
| <b>3. Single Crystal Structure</b> .....                           | <b>9</b>  |
| <b>4. DSC analysis of L2</b> .....                                 | <b>10</b> |
| <b>5. Photo physical properties of self-assembled fibres</b> ..... | <b>11</b> |

## 1. Molecular design

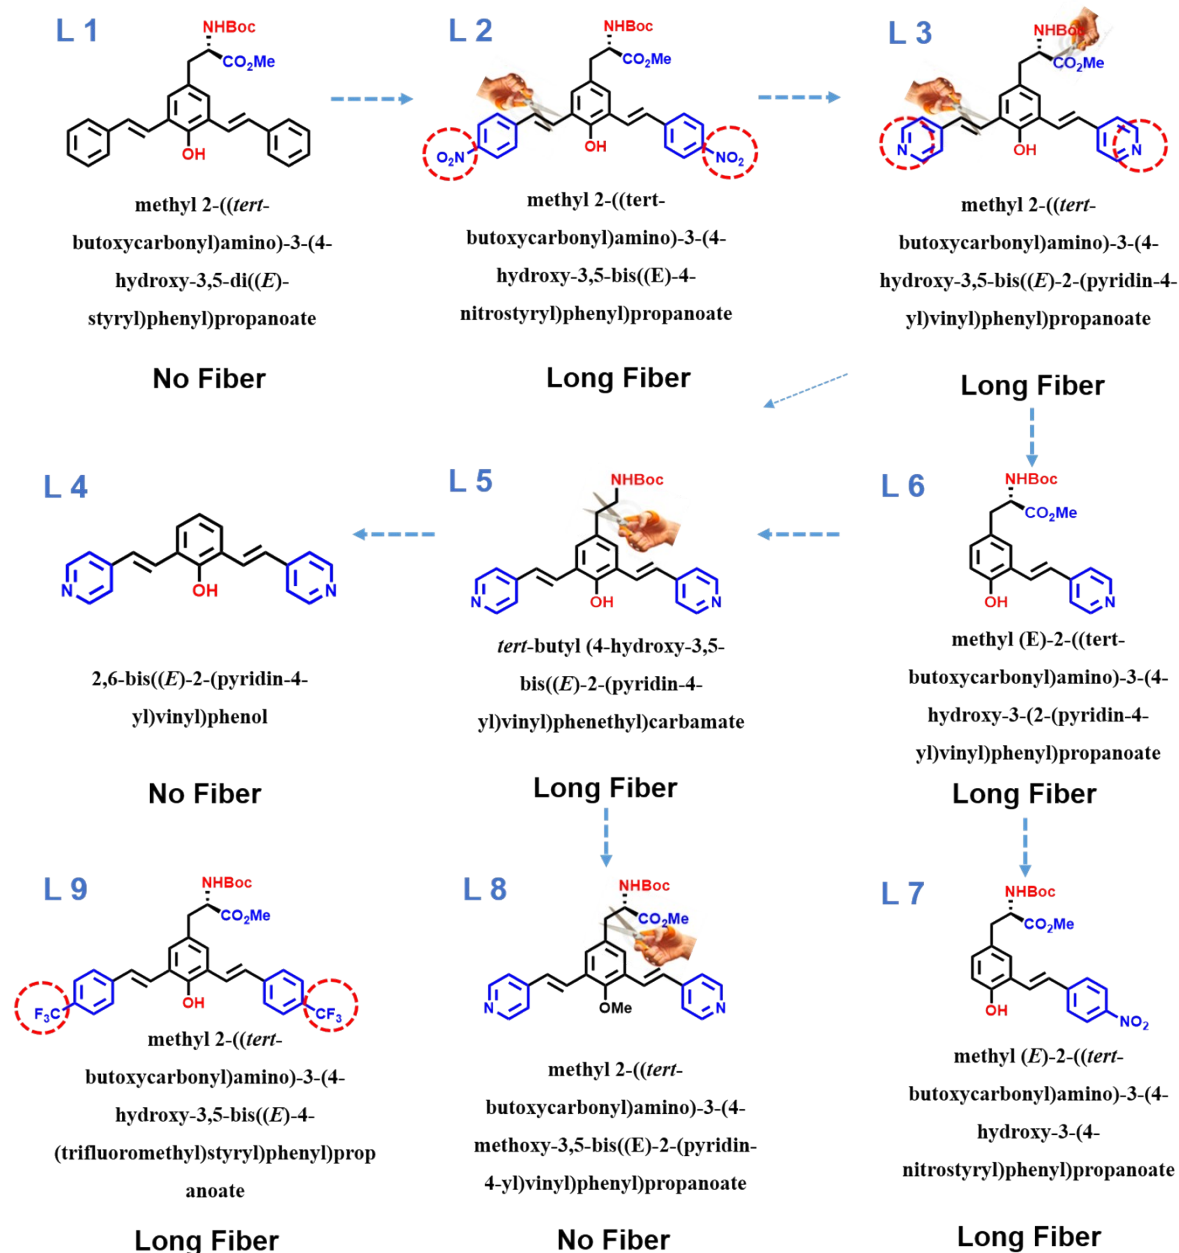

**Fig. S1: Molecular design of our system.** Molecular structures and corresponding name of L1-L9 used in this study. The self-assembled structures of L1-L9 are labelled. The attribution of functional groups in the assembly process can be understood.

## 2. Synthesis of L1 to L9

Molecules L1-L3, L6, L7, and L9 were synthesized according to our previous paper<sup>1</sup>.

### 2.1 Synthesis of L 4

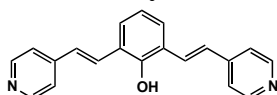

2,6-diiodophenol (500mg, 1.45mmol) and 4-vinylpyridine (0.31ml, 2.9mmol) were dissolved in 10ml N,N'-dimethylformamide and 10ml diisopropylethylamine in a flask. The mixture was bubbled with N<sub>2</sub> for 20min and palladium acetate (33.7mg, 0.15mmol) and tris(2-methylphenyl)phosphine (60.8mg, 0.2mmol) were added into the mixture under N<sub>2</sub> flow. The reaction was stirred at 100°C under N<sub>2</sub> for 24h. The reaction was cooled to room temperature and filtered through celite. The filtrate was collected and evaporated in vacuum. The crude product was purified by column chromatography with methanol/ethyl acetate (1/4, volume ratio) as eluent. After removing the solvent, 200mg white crystal was collected with yield of 46%. <sup>1</sup>H-NMR (400MHz, DMSO-d<sub>6</sub>), δ 9.65(s, 1H), 8.56(d, 4H, *J*=5.6Hz) 7.85(d, 2H, *J*=16.4Hz), 7.68 (d, 2H, *J*=4.0Hz), 7.56(d, 4H, *J*=6.0Hz), 7.21(d, 2H, *J*=16.4Hz), 6.98(t, 1H, *J*=5.6Hz); <sup>13</sup>C-NMR (100MHz, DMSO-d<sub>6</sub>), δ 153.31, 150.19, 145.42, 128.53, 127.57, 126.58, 125.60, 121.44, 121.12

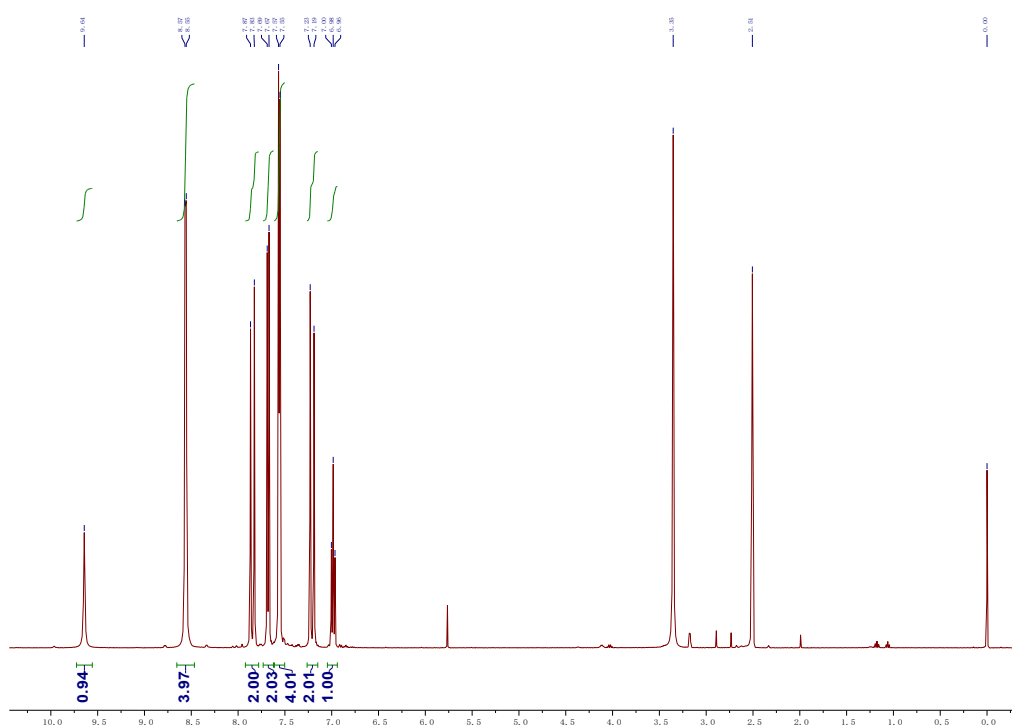

**Fig. S2** <sup>1</sup>H-NMR (400MHz, DMSO-d<sub>6</sub>) spectrum of **L4**

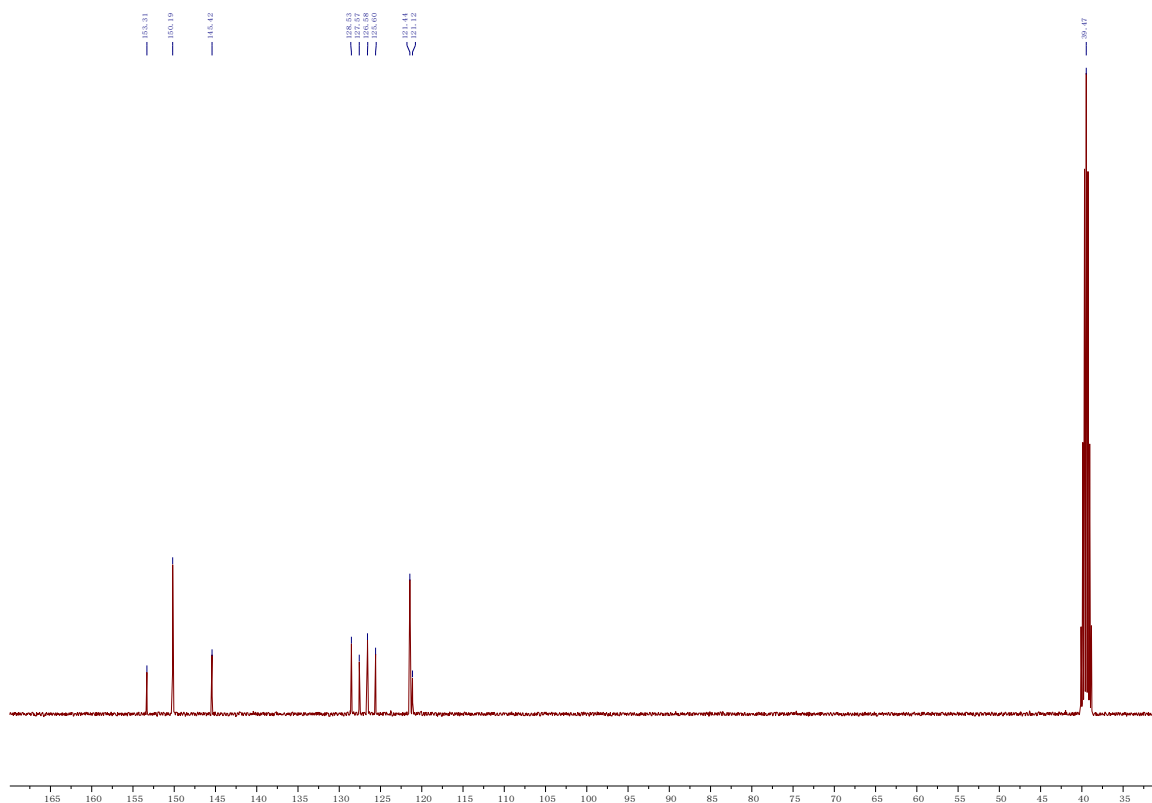

**Fig. S3**  $^{13}\text{C}$ -NMR (100MHz, DMSO- $d_6$ ) spectrum of **L4**

## 2.2 Synthesis of L 5

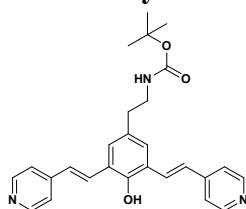

*tert*-butyl (3,5-diiodo-4-methoxyphenethyl)carbamate (540mg, 1.07mmol) and 4-vinylpyridine (0.23ml, 2.14mmol) were dissolved into the mixture of 10ml *N,N'*-dimethylformamide and 10ml diisopropylethylamine. The reaction mixture was bubbled with argon for 20 minutes to remove oxygen. Palladium acetate (24.0mg, 0.11mmol) and tris(2-methylphenyl)phosphine (45.6mg, 0.15mmol) were added into the mixture under  $\text{N}_2$  flow. The reaction was stirred at  $100^\circ\text{C}$  under  $\text{N}_2$  for 24h. The reaction was cooled to room temperature and filtered through celite. The filtrate was collected and evaporated in vacuum. The crude product was purified by column chromatography with methanol/ethyl acetate (1/9, volume

ratio) as eluent. After removing the solvent, 156.7mg off-white solid was collected with yield of 32%.  $^1\text{H-NMR}$  (400MHz, DMSO- $d_6$ )  $\delta$  9.46(s, 1H), 8.56(d, 4H,  $J=5.2\text{Hz}$ ), 7.82(d, 2H,  $J=16.4\text{Hz}$ ) 7.56(d, 4H,  $J=5.6\text{Hz}$ ), 7.51(s, 2H), 7.20(d, 2H,  $J=16.4\text{Hz}$ ), 6.95(t, 1H,  $J=5.2\text{Hz}$ ), 3.20(q, 2H,  $J=7.6\text{Hz}$ ), 2.70(t, 2H,  $J=7.2\text{Hz}$ ), 1.36(s, 9H);  $^{13}\text{C-NMR}$  (100MHz, DMSO- $d_6$ ),  $\delta$  156.05, 151.93, 150.52, 145.21, 131.55, 128.51, 127.63, 126.40, 125.35, 121.33, 77.97, 41.93, 35.21, 28.74

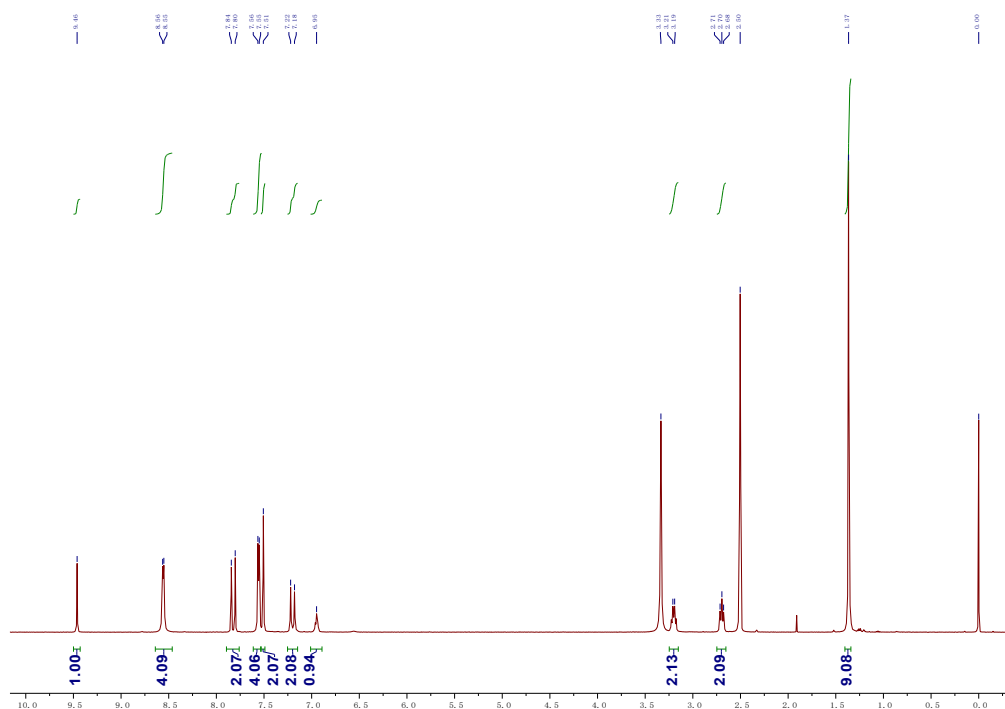

**Fig. S4**  $^1\text{H-NMR}$  (400MHz, DMSO- $d_6$ ) spectrum of **L5**

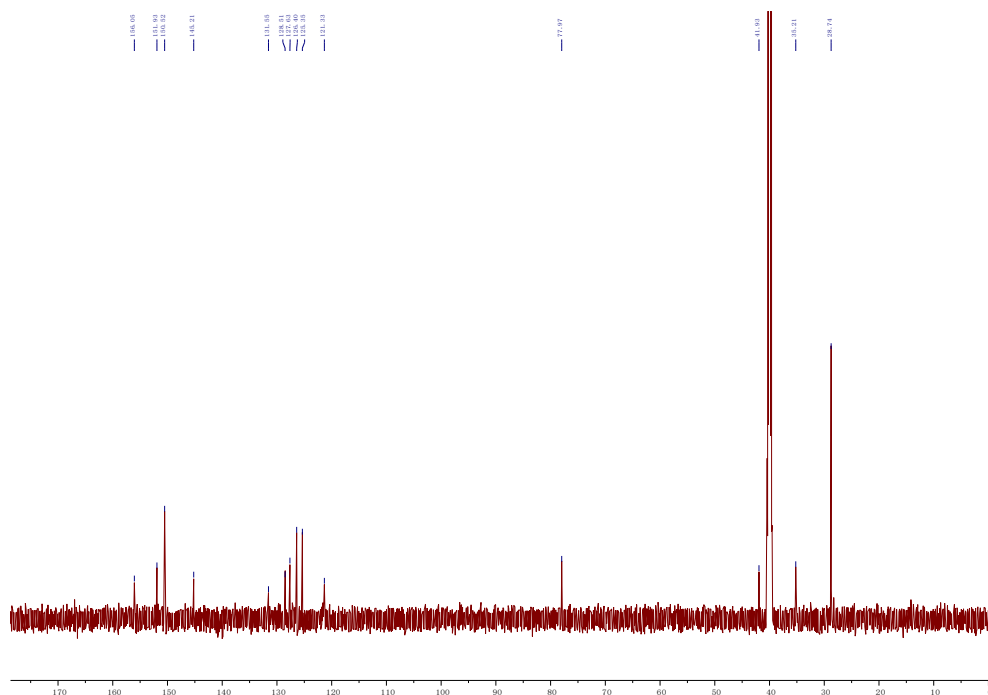

**Fig. S5**  $^{13}\text{C}$ -NMR (100MHz, DMSO-d<sub>6</sub>) spectrum of **L5**

### 2.3 Synthesis of **L 8**

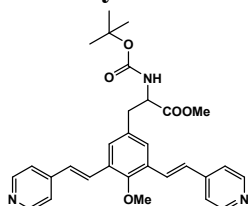

methyl 2-((tert-butoxycarbonyl)amino)-3-(3,5-diiodo-4-methoxyphenyl)propanoate (400mg, 0.71mmol) and 4-vinylpyridine (0.15ml, 1.42mmol) were dissolved into the mixture of 10ml N,N'-dimethylformamide and 10ml diisopropylethylamine. The reaction mixture was bubbled with argon for 20 minutes to remove oxygen. Palladium acetate (15.7mg, 0.07mmol) and tris(2-methylphenyl)phosphine (30.4mg, 0.1mmol) were added into the mixture under N<sub>2</sub> flow. The reaction was stirred at 100°C under N<sub>2</sub> for 24h. The reaction was cooled to room temperature and filtered through celite. The filtrate was collected and evaporated in vacuum. The crude product was purified by column chromatography with methanol/ethyl acetate (1/9, volume ratio) as eluent. After removing the solvent, 113.5mg off-white solid was collected with yield of 31%.  $^1\text{H}$ -NMR (DMSO-d<sub>6</sub>, 400MHz)  $\delta$  8.63 – 8.57 (m, 4H), 7.73 (s, 2H), 7.65 (d, J = 16.5

Hz, 2H), 7.63 – 7.58 (m, 4H), 7.43 (d, J = 8.3 Hz, 1H), 7.31 (d, J = 16.5 Hz, 2H), 4.34 (dd, J = 5.0, 2.3 Hz, 1H), 3.12 (dd, J = 13.8, 4.8 Hz, 1H), 2.91 (dd, J = 13.8, 10.7 Hz, 1H), 1.31 (s, 9H).; <sup>13</sup>C-NMR (DMSO-d<sub>6</sub>, 100MHz), δ 172.52, 155.40, 154.94, 150.16, 144.21, 133.89, 129.46, 128.00, 127.57, 126.74, 120.92, 78.30, 62.60, 54.93, 51.88, 36.06, 28.05

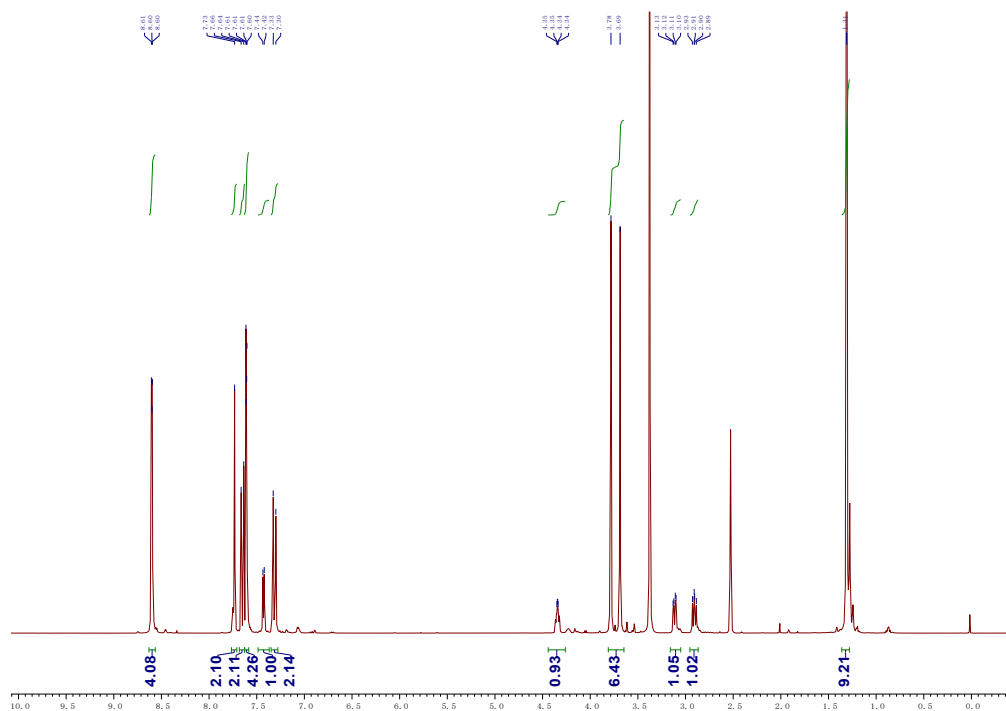

**Fig. S6** <sup>1</sup>H-NMR (400MHz, DMSO-d<sub>6</sub>) spectrum of **L8**

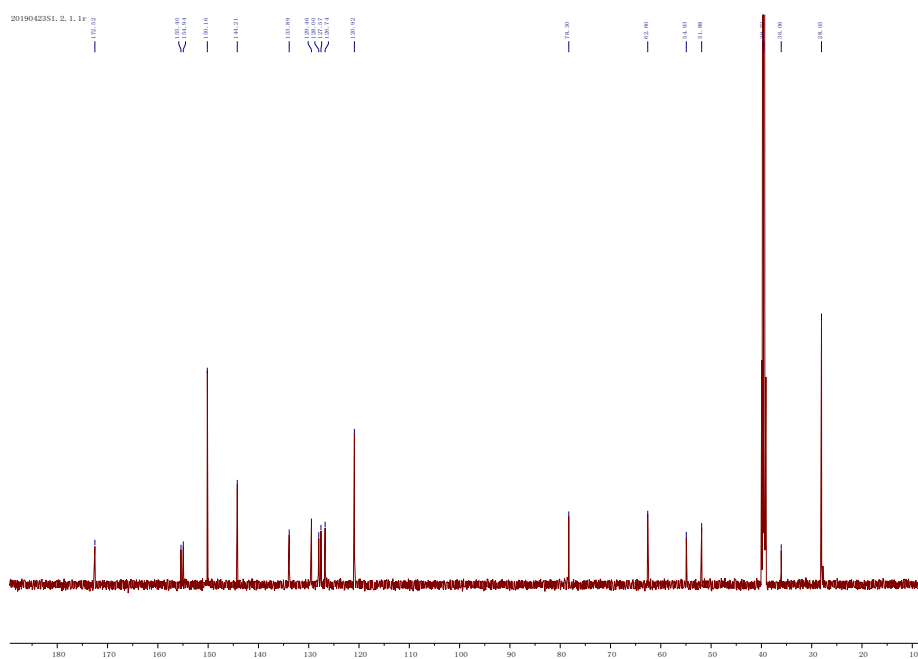

**Fig. S7** <sup>13</sup>C-NMR (100MHz, DMSO-d<sub>6</sub>) spectrum of **L8**



### 3. Single Crystal Structure

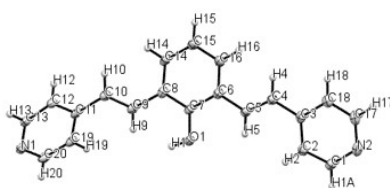

**Fig. S8** Single crystal structure of L4. C, N and O atoms are shown as ellipsoids at the 50% probability level.

**Table S1.** Crystallographic data of L4.

|                       |   |                    |
|-----------------------|---|--------------------|
| Compound              |   | L 6                |
| Formula               |   | $C_{20}H_{16}N_2O$ |
| Space group           |   | $C2/c$             |
| Temperature (K)       |   | 100.0              |
| Crystal system        |   | monoclinic         |
| Unit Cell Lengths (Å) | a | 17.1908(14)        |
|                       | b | 6.0394(4)          |
|                       | c | 29.880(2)          |

|                                       |          |            |
|---------------------------------------|----------|------------|
| Unit Cell angles (°)                  | $\alpha$ | 90         |
|                                       | $\beta$  | 104.899(3) |
|                                       | $\gamma$ | 90         |
| Cell Volume (Å <sup>3</sup> )         |          | 2998.0(4)  |
| Z                                     |          | 8          |
| Final R indices<br>[I>2 $\sigma$ (I)] | R1       | 0.0507     |
|                                       | wR2      | 0.1145     |

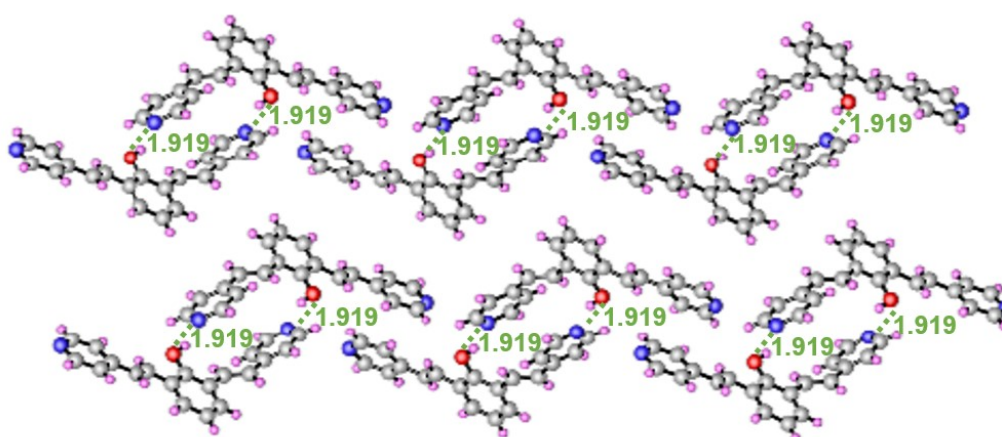

**Fig. S9** Single crystal structure of L6 with interlocked dimer structure through intermolecular hydrogen bonding

#### 4. DSC analysis of L2

The self-assembled nanofibres have higher melting point than that of pristine powder, which reveals the formation of strong and uniform hydrogen-bonding in the self-assembled structure. Hydrogen bonding interaction is stronger than other intermolecular interactions such as dipole–dipole attraction,  $\pi$ – $\pi$  stacking, hydrophobic effect and electrostatic interaction. Therefore, self-assembled fibre with dominated hydrogen bonding interaction has larger melting point compared to the pristine powder without dominated hydrogen bonding interaction.

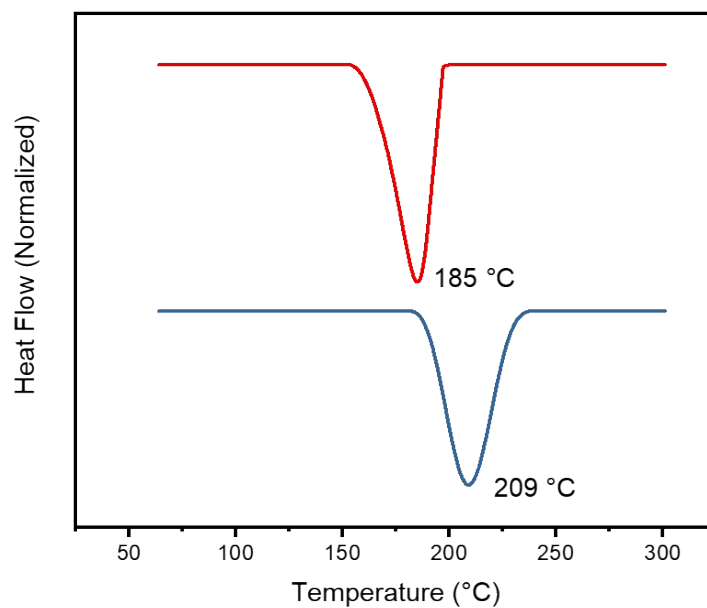

**Fig. S10** Differential Scanning Calorimetry thermogram of the powder of L2 (red) and self-assembled fibre of L2 (blue).

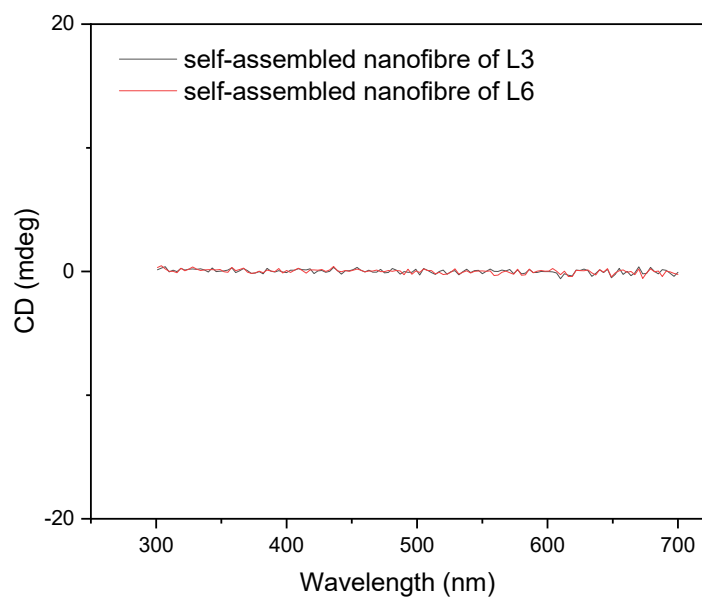

**Fig. S11** CD spectra of the self-assembled fibers formed by L3 and L6.

## 5. Photo physical properties of self-assembled fibres

Fluorescence lifetime imaging microscopy (FLIM) has been used to reveal the lifetime of individual nanofibre and then ascertain the size/structure-dependent optical and photophysical properties. The FLIM mapping images that show lifetime of individual nanofibres denoted nanofibre 1 to 8 are shown in Fig. S11 and Fig. S13. By fitting the time-dependent attenuation (Fig S12(a) and Fig S13(c)), the lifetime of nanofibres was determined in Table S2 and S3. The monotonic increase in lifetime with decreasing nanofibre diameter suggests an increase in the number of nanofibres in each nanofibre bundle is an implication of nanofibre bundles has led to a smaller lifetime. It is particularly important to note that despite the difference in fibre diameter and fluorescence lifetime, the PL spectra of all these nanofibres are basically unchanged (Fig. 12S(b) and Fig. S13(d)) which suggests the overall chemical environment and interaction between chromophores remains unchanged.

**Table S2.** The parameter values of the kinetics of lifetime of single nanofibre in points 1-6.

|                | <b>Amp<br/>Avg<br/>Lifetime</b> | <b>Int Avg<br/>Lifetime</b> | <b>A<sub>1</sub></b> | <b>t<sub>1</sub></b> | <b>A<sub>2</sub></b> | <b>t<sub>2</sub></b> | <b><math>\chi^2</math></b> | <b>Background</b> | <b>Diameter<br/>(<math>\mu m</math>)</b> |
|----------------|---------------------------------|-----------------------------|----------------------|----------------------|----------------------|----------------------|----------------------------|-------------------|------------------------------------------|
| <b>Fibre_1</b> | 0.5                             | 0.83                        | 1491.32              | 0.292                | 392.53               | 1.291                | 1.019                      | 35.43             | 0.20                                     |
| <b>Fibre_2</b> | 0.38                            | 0.59                        | 435.41               | 1.078                | 2591.32              | 0.268                | 0.973                      | 35.25             | 0.25                                     |
| <b>Fibre_3</b> | 0.3                             | 0.38                        | 5647.71              | 0.24                 | 783.37               | 0.721                | 1.056                      | 42.24             | 0.45                                     |
| <b>Fibre_4</b> | 0.33                            | 0.46                        | 829.4                | 0.826                | 4910.69              | 0.246                | 1.059                      | 47.22             | 0.37                                     |
| <b>Fibre_5</b> | 0.34                            | 0.46                        | 772.65               | 0.826                | 4562.71              | 0.255                | 0.957                      | 46.23             | 0.35                                     |
| <b>Fibre_6</b> | 0.29                            | 0.35                        | 1263.95              | 0.651                | 9379.59              | 0.245                | 1.113                      | 47.93             | 1                                        |





|             |      |      |         |       |          |       |       |       |      |
|-------------|------|------|---------|-------|----------|-------|-------|-------|------|
| <b>Pt_6</b> | 0.31 | 0.4  | 2545.02 | 0.741 | 17117.01 | 0.249 | 1.285 | 98.64 | 0.50 |
| <b>Pt_7</b> | 0.28 | 0.33 | 1138.3  | 0.581 | 7517.38  | 0.237 | 1.025 | 37.92 | 1.29 |
| <b>Pt_8</b> | 0.28 | 0.32 | 1339.13 | 0.551 | 8451.52  | 0.239 | 0.994 | 41.02 | 1.35 |
